# Supplementary material
Source: PubMed Central journal article supplement (PMC3497374)
Supplement: AEM.02286-12_zam999103893so1.pdf [file AEM.02286-12_zam999103893so1.pdf]

## Supplementary Material

**Figure S1.** Primary sequence alignment of biotin-binding proteins in fungi. Protein names or identifiers are displayed for each sequences found in *Pleurotus cornucopiae* (Pc), *Galerina marginata* (Gm), *Hypholoma sublateritium* (Hs). Conserved residues are highlighted. Residues that interact with biotin in tamavidin 2 are indicated (\*).

```

      1      10      20      30      40      50      60
Pc_Tamavidin2  .MSDVQSSLTGTTWYNELNSKMELTANKDGLTGTGKYLSKVGDVYVVPYPLSGRYNLOPPAGQ.....GVA
Pc_Tamavidin1  .MKDVQSSLTGTWYNELGSTMNLTKNDGSLTGTYHSNVGVEVPPTYHLSGRYNLOPPSSGQ.....GVT
Gm2_1328802    MSKKFGIETLSGDWYNQLGSTVHFVADLNGGLVGGKYIISAVGHAEDGYRLNGRFDADPPAGE.....GVS
Gm3_78940      MSYKFDPKALSGDWHNQLGSKVHFADADGGITGKYHSAVGKVEDFYILLGRFDTNPEENE.....GVS
Gm4_253228     MTNKFDPNTLACDWHNQLGSKVHFVTDPNCGITGKYNSAVGRAEDFYVLTGRFDANPPLDE.....GVS
Hs_173356      .MSNRLSGTWYNELGSTMLTLTADATGCLSGKYKSAVGNADFFVLTGRYDTNAPSDK.....GVS
Gm6_159069     MSNKFDYSNLSGDWYNRIQLQVNLIPADGSLKGGKLYDD...KKAVIDLTGRFDTPPSGD.....GAS
Gm5_25497      .....TLAGDWYNELGSHLILTPDSSKGLTGMYDSAVGRAHYFYVLTGRFDTNPPQDDKDGPNYGV
                                     * * * *
      70      80      90      100     110     120
Pc_Tamavidin2  LGWAVSWENNS....K.IHSATTWSGOFFSESSPV...ILTQWLLSSSTARGDVVESTLVGNDSTTKTA
Pc_Tamavidin1  LGWAVSFENNT....SANVHSVSTWSGQYFSEPAEV...ILTQWLLSSSEREDLWQSTHVGHDFRSKTK
Gm2_1328802    LGWTVNWRNVLPDGTVNNAHSTTTWSGQYFDESSVGERIVTNWLLTOSTDPSDIWNSTNVGNDATFRIM
Gm3_78940      VGWTVNWRNVV.DGKENNRHSSTTWSGQYFDTTSGV.BRIVTNWLLTRSTEAKDIWSTNVGNDTFVRDK
Gm4_253228     VGWTVNWRNFI.NGKENNHSSTTWSGQYFDKSTGV.BRIVTNWLLTOSTTTNDSWSTNVGNDTFVRDK
Hs_173356      LAWTVAYNNSL....RNAHSTAGWSGQYFDDDDGE.EKILTHWLLTSSSTSESVWSTNVGNTLFTNRN
Gm6_159069     VGWVVTRENVV...KPTHEHNNSTTWSGQYFDWNGGV.ESIAASWLLTOSTIARKSNSTNVGNDLFTREK
Gm5_25497      VGWAVTRENNDT...AGNNSSTTWSGQYFAATKNVVERILTQWLLTOSTDRILINDATNVGADTFVREK
                                     * * * *
      130     140
Pc_Tamavidin2  PTEQQIAHAQLHCRAPRLK.....
Pc_Tamavidin1  PTKKQIAQAQLLRRGLKFE.....
Gm2_1328802    PSAAETSKAKALSFGSPHPQQILAKK.....
Gm3_78940      PSAAETSMDETLSVGSPPNPEQLLARR.....
Gm4_253228     PSAAETAKAKALSFGSPHPPEELLARR.....
Hs_173356      PSTADTAKARAILAESATKSEKVAABESRRSGSRLARL
Gm6_159069     PSDAETAKAKAVLFGRR.....
Gm5_25497      PTDSEIAKAMQLR.....

```

**Table S2.** Overview of characterized avidin-like, biotin-binding proteins.

| Name          | Organism                             | pI   | MW (kDa)<br>/Oligomeric | Localization | Reference |
|---------------|--------------------------------------|------|-------------------------|--------------|-----------|
| Avidin        | <i>Gallus gallus</i>                 | 10.0 | 15.6 /<br>tetramer      | Secreted     | (5)       |
| Streptavidin  | <i>Streptomyces<br/>svidinii</i>     | 6.1  | 16.5 /<br>tetramer      | Secreted     | (2)       |
| Bradavidin I  | <i>Bradyrhizobium<br/>japonicum</i>  | 6.3  | 14.3 /<br>tetramer      | Secreted     | (10)      |
| Bradavidin II | <i>Bradyrhizobium<br/>japonicum</i>  | 9.6  | 12.56 /<br>tetramer     | Secreted     | (6)       |
| Rhizavidin    | <i>Rhizobium etli</i>                | 4.0  | 14.0 /<br>dimer         | Secreted     | (7)       |
| Burkavidin    | <i>Burkholderia<br/>pseudomallei</i> | 7.4  | 14.2 /<br>tetramer      | Secreted     | (11)      |
| Tamavidin 2   | <i>Pleurotus<br/>cornucopiae</i>     | 7.4  | 15.5 /<br>tetramer      | Cytoplasmic  | (13)      |
| Xenavidin     | <i>Xenopus<br/>tropicalis</i>        | 9.2  | 18.6 /<br>tetramer      | Secreted     | (8)       |

**Method S3.** Purification of recombinant tamavidin 2. A plasmid encoding a N-terminally His-tagged version of the protein was constructed and expressed in *E.coli* (BL21). The protein was purified via metal affinity chromatography using the Ni-NTA resin (Qiagen) according to manufacturer's protocol.

**Figure S4.** Comparison of the gut phenotype of *C. elegans* when fed either on recombinant *E.coli* expressing the nematotoxic lectin MOA and Tamavidin 2. *E.coli* expressing a vector control (VC) was used as control. Arrows point to the intestine.

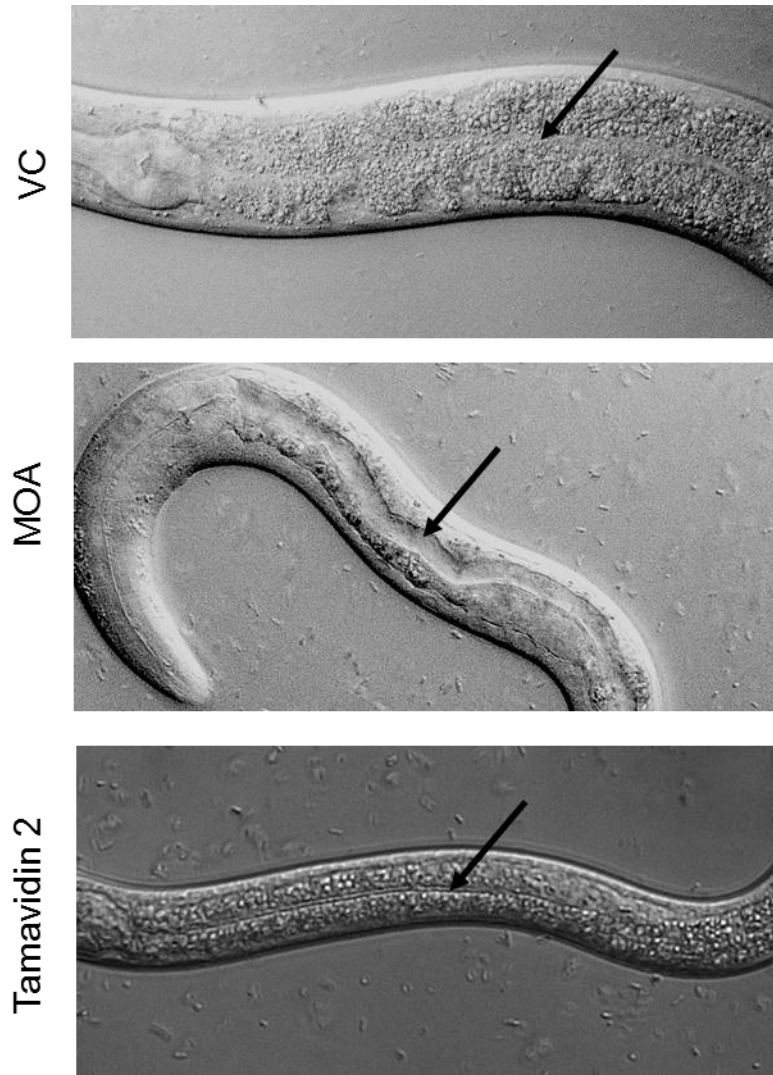

## Discussion S5

Considering the ability of these proteins to sequester biotin, the question arises of how organisms producing BBPs avoid reduction or depletion of biotin required for normal metabolism. In the case of plants, where no BBPs have been identified, most biotin exists as a free pool in the cytoplasm, and the rest in protein-bound form in the soluble fractions of chloroplasts and mitochondria (1). For this reason, heterologous expression of BBPs for biological control has to be targeted to the apoplast (12) or the vacuoles (9) in order not to interfere with plant viability. In *E. coli*, most of intracellular biotin is bound to proteins making the intracellular pool of free biotin very low (3, 4). This may explain why recombinant expression of tamavidins and other BBPs in the cytoplasm of *E. coli* is not toxic for the cell. The same may be true for fungi. The tamavidins are most likely synthesized in the cytoplasm of *P. cornucopiae* as they do not have a signal sequence for secretion. Accordingly, recombinant expression of tamavidins in the cytoplasm of the ascomycete *Ashbya gossypii* is possible without deleterious effects for this fungus (unpublished data). This result suggests that also in fungi, free-biotin pools are absent or minimal in the cytoplasm.

## References

1. **Baldet P, Alban C, Axiotis S, and Douce R.** 1993. Localization of free and bound biotin in cells from green pea leaves. Arch Biochem Biophys. **303**:67-73.
2. **Chalet L, and Wolf FJ.** 1964. The Properties of Streptavidin, a Biotin-Binding Protein Produced by Streptomyces. Arch Biochem Biophys. **106**:1-5.
3. **Cicmanec JF, and Lichstein HC.** 1978. Uptake of Extracellular Biotin by Escherichia-Coli Biotin Prototrophs. J Bacteriol. **133**:270-278.
4. **Cronan JE.** 1988. Expression of the Biotin Biosynthetic Operon of Escherichia-Coli Is Regulated by the Rate of Protein Biotination. J Biol Chem. **263**:10332-10336.
5. **Green NM.** 1990. Avidin and streptavidin. Methods Enzymol **184**:51-67.

6. **Helppolainen SH, Maatta JAE, Halling KK, Slotte JP, Hytonen VP, Janis J, Vainiotalo P, Kulomaa MS, and Nordlund HR.** 2008. Bradavidin II from *Bradyrhizobium japonicum*: A new avidin-like biotin-binding protein. *BBA-Proteins Proteom.* **1784**:1002-1010.
7. **Helppolainen SH, Nurminen KP, Maatta JA, Halling KK, Slotte JP, Huhtala T, Liimatainen T, Yla-Herttuala S, Airene KJ, Narvanen A, Janis J, Vainiotalo P, Valjakka J, Kulomaa MS, and Nordlund HR.** 2007. Rhizavidin from *Rhizobium etli*: the first natural dimer in the avidin protein family. *Biochem J.* **405**:397-405.
8. **Maatta JA, Helppolainen SH, Hytonen VP, Johnson MS, Kulomaa MS, Airene TT, and Nordlund HR.** 2009. Structural and functional characteristics of xenavidin, the first frog avidin from *Xenopus tropicalis*. *BMC Struct Biol.* **9**:63.
9. **Murray C, Markwick NP, Kaji R, Poulton J, Martin H, and Christeller JT.** 2010. Expression of various biotin-binding proteins in transgenic tobacco confers resistance to potato tuber moth, *Phthorimaea operculella* (Zeller) (fam. Gelechiidae). *Transgenic Res.* **19**:1041-1051.
10. **Nordlund HR, Hytonen VP, Laitinen OH, and Kulomaa MS.** 2005. Novel avidin-like protein from a root nodule symbiotic bacterium, *Bradyrhizobium japonicum*. *J Biol Chem.* **280**:13250-13255.
11. **Sardo A, Wohlschlager T, Lo C, Zoller H, Ward TR, and Creus M.** 2011. Burkavidin: A novel secreted biotin-binding protein from the human pathogen *Burkholderia pseudomallei*. *Protein Expr Purif.* **77**:131-139.
12. **Takakura Y, Oka N, Suzuki J, Tsukamoto H, and Ishida Y.** 2012. Intercellular production of Tamavidin 1, a biotin-binding protein from

Tamogitake mushroom, confers resistance to the blast fungus *Magnaporthe oryzae* in transgenic rice. *Mol Biotechnol.* **51**:9-17.

13. **Takakura Y, Tsunashima M, Suzuki J, Usami S, Kakuta Y, Okino N, Ito M, and Yamamoto T.** 2009. Tamavidins--novel avidin-like biotin-binding proteins from the Tamogitake mushroom. *FEBS J.* **276**:1383-1397.
